# Supplementary material
Source: publisher figshare collection journal article supplement (https://karger.figshare.com/ndownloader/files/13255697)
Supplement: Supplementary file 1 [file 13255697]

**Appendix 2.** Hierarchya for determining primary indication for induction.

| **Tier I**  Placental abruption  Chorioamnionitisb  Fetal indicationsc  Rupture of membranes | **Tier II**  Hypertensive disorderd  Diabetes mellitus  Cholestasis  Advanced maternal age  Stillbirth (current)  Acute psychiatric illness | **Tier III**  Late-term  Stillbirth (prior)  Social reasons |
| --- | --- | --- |

a If more than one indication is within the same tier, choose in descending order (highest listed=primary)

b Caution with chorioamnionitis as this is rarely an indication for induction at term but more commonly develops during induction

c Includes intrauterine growth restriction, oligohydramnios, anomalies, non-reassuring antenatal testing, other

d Includes chronic hypertension, gestational hypertension, preeclampsia, eclampsia, HELLP (hemolysis, elevated liver enzymes, low platelets) syndrome
